# Supplementary material for: Pan-genomic Matching Statistics for Targeted Nanopore Sequencing
Source: bioRxiv or medRxiv preprint supplement (doi:10.1101/2021.03.23.436610), 2021-03-23
Supplement: Supplementary file [file media-2.pdf]

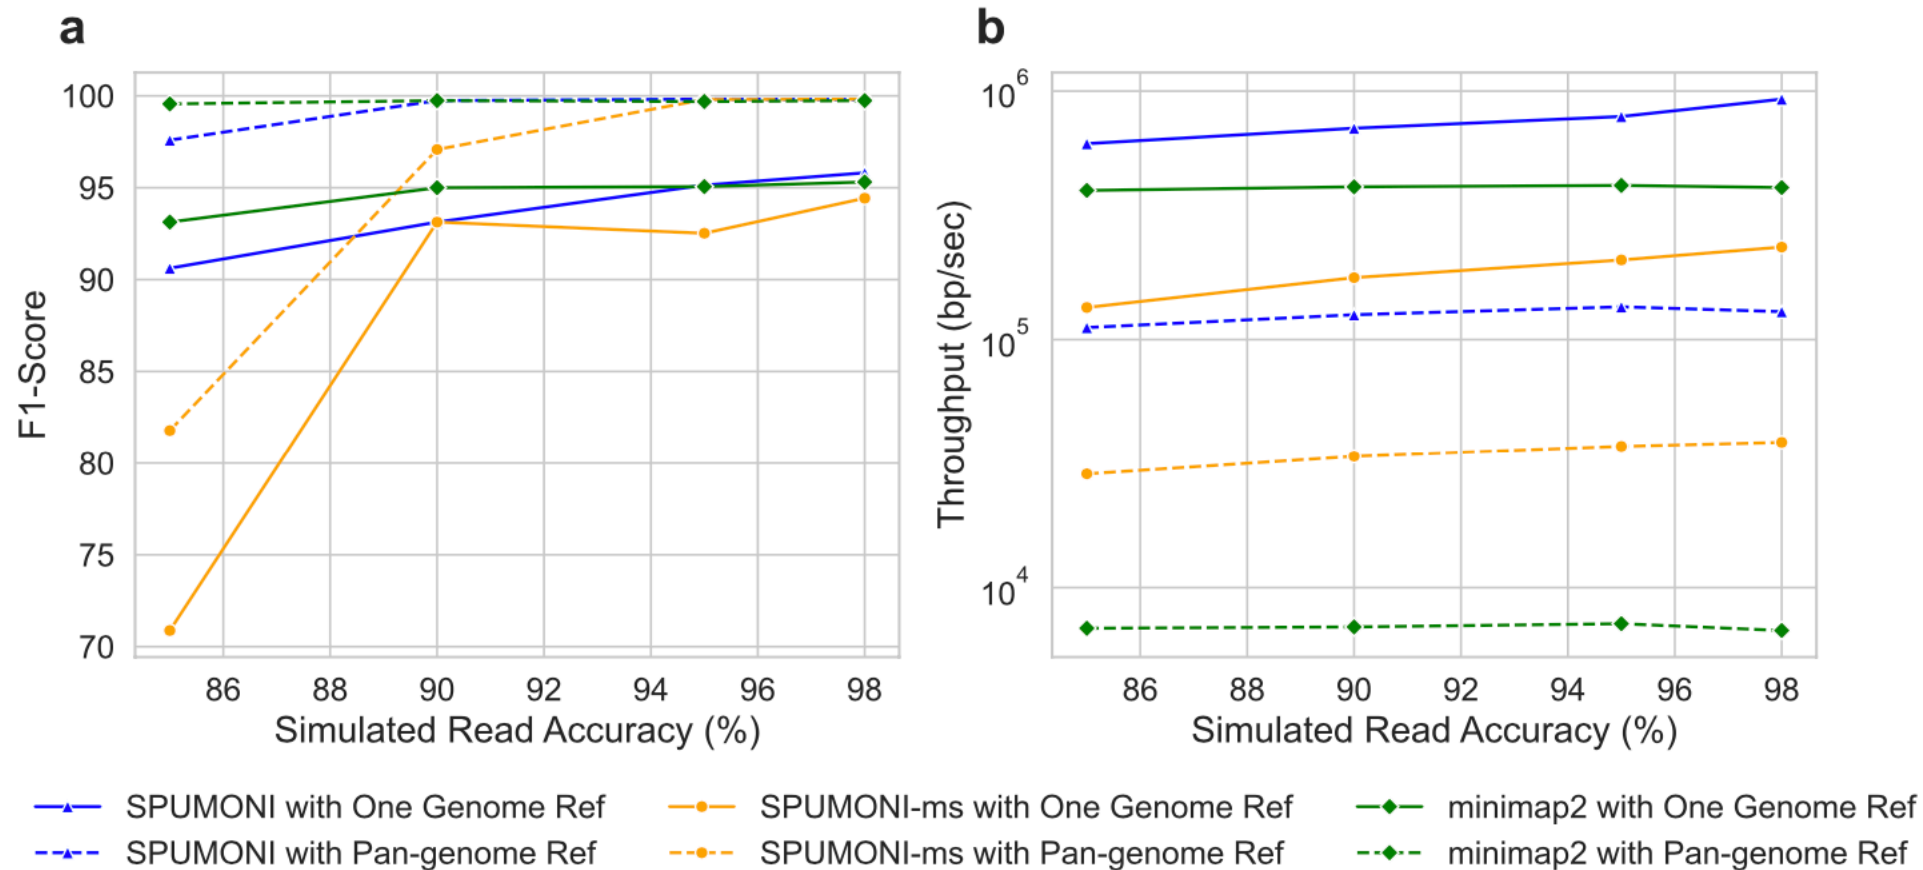

Supplementary Figure 2: Visualization of (a)  $F_1$ -score, (b) throughput with varying simulated base-call accuracies.
